# Supplementary material for: Part 1: Zonal gradients in phosphorus and nitrogen acquisition and stress revealed by metaproteomes of Prochlorococcus and Synechococcus
Source: Copernicus journal article supplement (doi:10.5194/egusphere-2024-3987), 2025-02-05

Figure S1. Relationship between (a) phosphate (nM) and alkaline phosphatase (AP) activity (nM d-1) and (b) dissolved organic phosphorus (DOP, nM) and alkaline phosphatase activity (nM d-1) using data published in Mahaffey et al., (2014) and this study (JC150).


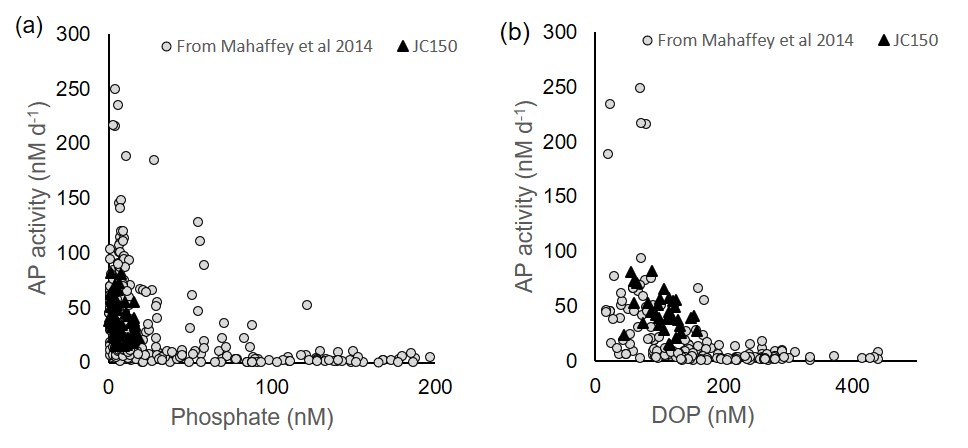

Supplement: Supplementary file 1 [file Figure S1.docx]
