# Supplementary material for: Part 1: Zonal gradients in phosphorus and nitrogen acquisition and stress revealed by metaproteomes of Prochlorococcus and Synechococcus
Source: Copernicus journal article supplement (doi:10.5194/egusphere-2024-3987), 2025-02-05

Figure S2. Figure S2. Zonal variation in the spectral counts of (a) PstS, (b) PhoA, (c) PhoX and (d) UrtA at different levels taxonomic specificity in *Prochlorococcus* indicating the coherence in patterns in biomarker proteins across clades. HLII 9314 peptides are those specific to the strain MIT9314 based on amino acid sequence and comparison to a comprehensive collection of isolate genomes and MAG genomes. HLII peptides are those that are specific to the HLII ecotype but are shared among many HLII strains. All *Prochlorococcus* peptides are those that are specific to *Prochlorococcus* but are shared across ecotypes.


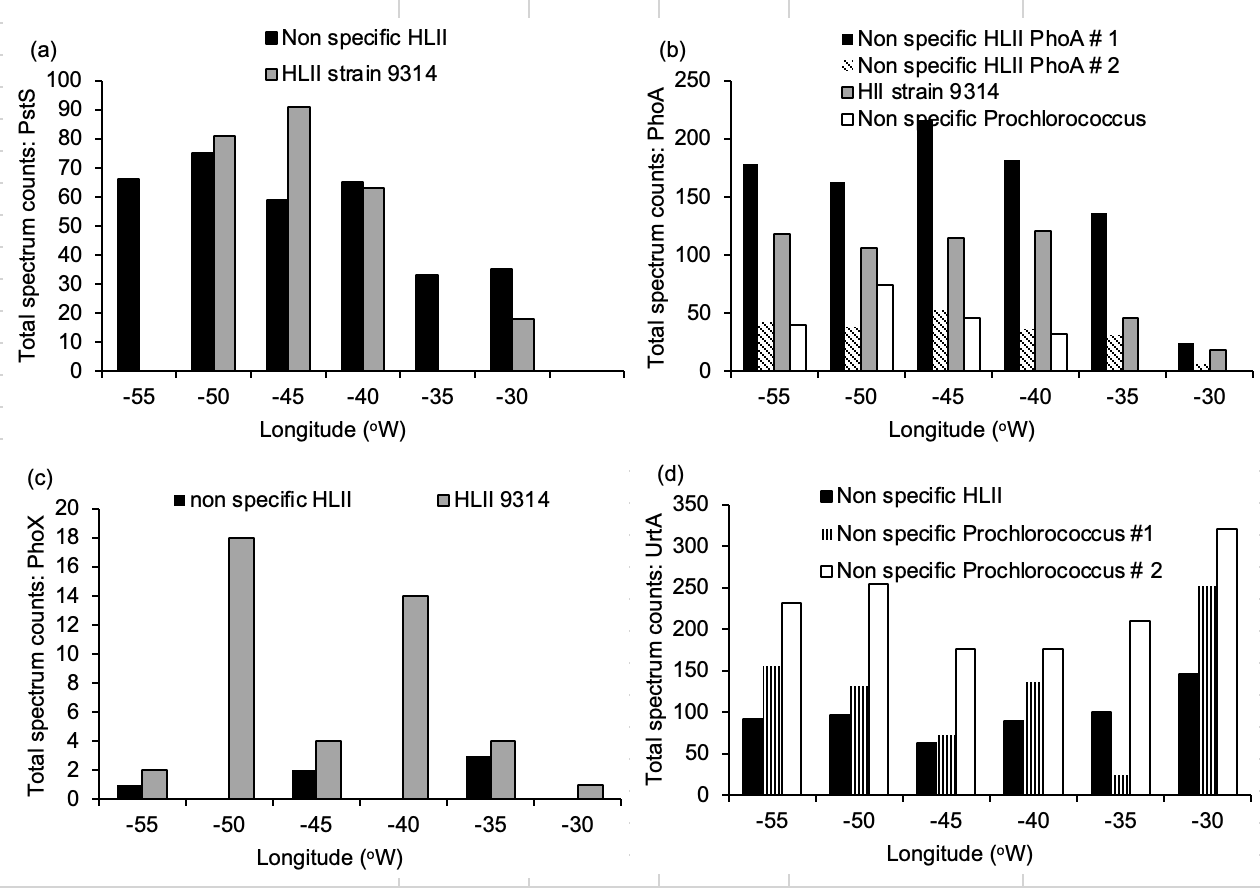

Supplement: Supplementary file 2 [file Figure S2.docx]
