# Supplementary material for: Part 1: Zonal gradients in phosphorus and nitrogen acquisition and stress revealed by metaproteomes of Prochlorococcus and Synechococcus
Source: Copernicus journal article supplement (doi:10.5194/egusphere-2024-3987), 2025-02-05

Figure S3. Zonal change in ecotypes of Prochlorococcus gleaned from the global metaproteome analysis, specifically (a) HLI (MIT9515) (b) HLII (MIT9215 plus 9312) and (c) the ratio between HLI and HLII.


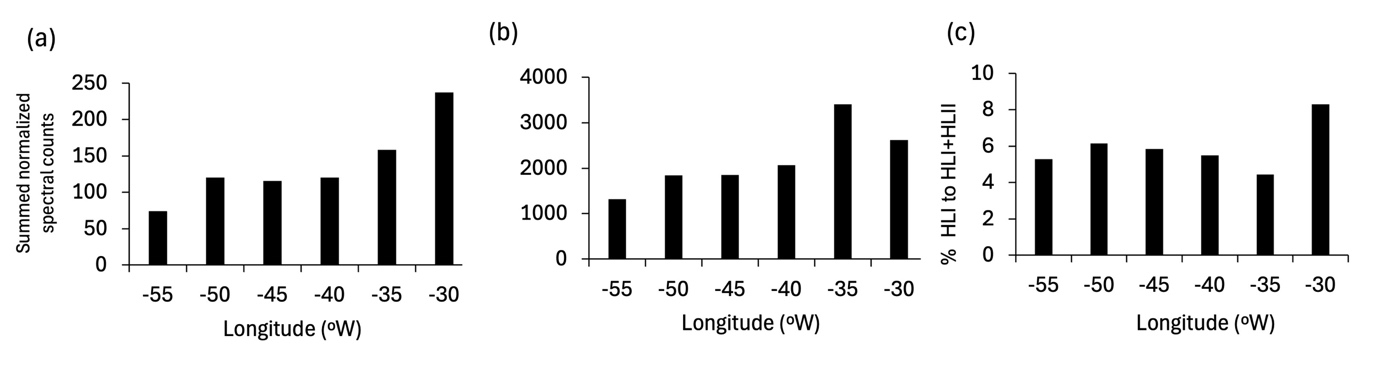

Supplement: Supplementary file 3 [file Figure S3.docx]
