# Supplementary material for: Part 1: Zonal gradients in phosphorus and nitrogen acquisition and stress revealed by metaproteomes of Prochlorococcus and Synechococcus
Source: Copernicus journal article supplement (doi:10.5194/egusphere-2024-3987), 2025-02-05

Figure S4. Relationship between (a) *Synechococcus* cell abundance (cells L-1) and PhoA (total spectral counts), (b) *Synechococcus* cell abundance (cells L-1) and concentrations of dissolved organic phosphorus (DOP, nM) and (c) *Synechococcus* cell abundance (cells L-1) and and alkaline phosphatase activity (AP, nM d-1). The R2value and p-values are reported and indicate no significant relationship between properties.


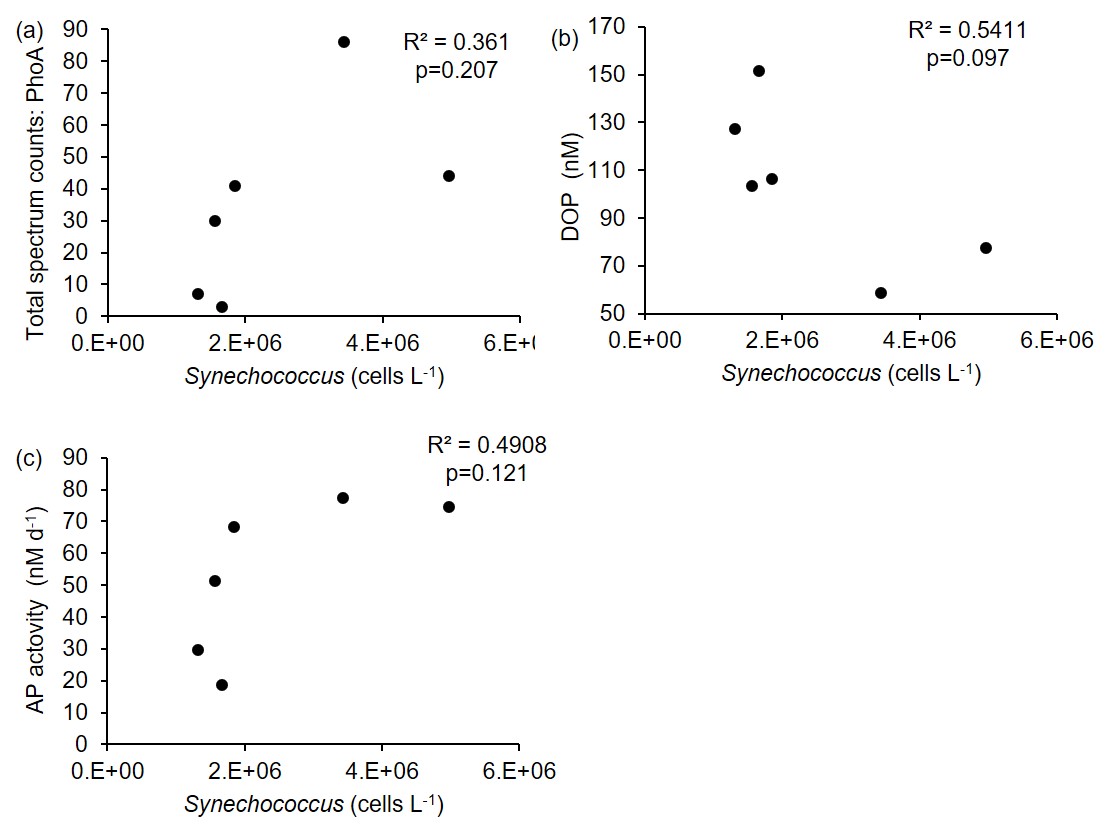

Supplement: Supplementary file 4 [file Figure S4.docx]
