# Supplementary material for: Part 1: Zonal gradients in phosphorus and nitrogen acquisition and stress revealed by metaproteomes of Prochlorococcus and Synechococcus
Source: Copernicus journal article supplement (doi:10.5194/egusphere-2024-3987), 2025-02-05
Supplement: Supplementary file 6 [file Table S1.xlsx]

## Sheet: Table S1
Table S1. Description of sample collection for protein biomarkers
McLane Pumps sample log from JC150 stations 2 to 7 including location, depth sampled, Sample ID, deployment number, pump number, filter size (mm) and volume filtered (L).
Note that particles captured on the 0.2 mm filter represent the 0.2 to 3 mm particle fraction due to the stacking of filters (see methods for details).
Only 17L was filtered at JC150_4 due to high particle biomass.
	JC150_2	JC150_3	JC150_4	JC150_5	JC150_6	JC150_7
Latitude, Longitude	22°N, 54°W	22°N, 50°W	23°N, 45°W	23°N, 40°W	22.32°N, 35.86°W	22°N, 31°W
Depth (m)	15	15	15	15	15	15
Sample ID	St2A_P3_1	St3A_P1_1	St4A_P1_1	St5A_P1_1	St6B_P3_1	St7B_P1_1
Deployment	A	A	A	A	B	B
Pump number	3	1	1	5	2	2
Filter size (mm)	0.2	0.2	0.2	0.2	0.2	0.2
Vol. filtered (L)	195	358.5	17	40.1	328.48	128.4
