# Supplementary material for: Part 1: Zonal gradients in phosphorus and nitrogen acquisition and stress revealed by metaproteomes of Prochlorococcus and Synechococcus
Source: Copernicus journal article supplement (doi:10.5194/egusphere-2024-3987), 2025-02-05
Supplement: Supplementary file 7 [file Table S2.xlsx]

## Sheet: Table S2
Table S2. Protein Accessions are listed per the protein FASTA file (provided with the PriDE submission) or from the alkaline phosphatase fasta (supplementary data file XX). Different accession types are given depending on the source of the sequence (e.g. GenBank versus KEGG)
Peptides were excluded from quantification if they are not specific to the genus, based on matching to isolate genomes, MAGs, and metagenomes using metatryp
Protein Accession	Accession type	Peptides Identified	Peptides excluded from quantification	Protein Name	Organism
ABO17862.1	GenBank	'AAALQNLSGEYVKPTVEAGAK', 'AFIDQTVNFGASDDPMK', 'AFIDQTVNFGASDDPMKDK', 'AFIDQTVNFGASDDPMKDKDIAK', 'AFTNSMEAFSK', 'ALNGITLDENLAGK', 'ALNGITLDENLAGKNPNPTAK', 'APSLGFVPLK', 'APSLGFVPLKGDILEK', 'AVQVAMGMVK', 'GAYPIASLTWILAYEEGNGR', 'GNSGVAGVIQNTPGAIGYVNQSYIK', 'GNSGVAGVIQNTPGAIGYVNQSYIKGNVK', 'KAFIDQTVNFGASDDPMK', 'LSGAGASFPAK', 'LTWAHR', 'QAFNTLLSDEYQDK', 'QAFNTLLSDEYQDKAPSLGFVPLK', 'QAFNTLLSDEYQDKAPS…	'AFIDQTVNFGASDDPMK','APSLGFVPLK','WPAGVGAK','TWTLGTGK','VNYQAVGSGSGR'	PstS	Prochlorococcus
EDZ60867.1	GenBank	'DAWNSLVMK', 'DAWNSLVMKK', 'KAHVGVIPGLHEFVK', 'AHVGVIPGLHEFVK', 'LVDNIYK', 'GYLADIGLVPLDK', 'NWNEIDSSLPNKPIK', 'RGYLADIGLVPLDK'		PstS	SAR11
PMM0710	KEGG	'AAALQNLSGEFLKPSVEAGAK', 'AFIDQTVNFGASDDPMK', 'AFIDQTVNFGASDDPMKDKDIAK', 'AFTNSMEAFSPTWTLGTGK', 'ALNGITLDENLAGK', 'ALNGITLDENLAGKNPNPTAK', 'GNSGVAGVIQNTPGAIGYVNQSYIK', 'GNSGVAGVIQNTPGAIGYVNQSYIKGNVK', 'KAFIDQTVNFGASDDPMK', 'LSGAGASFPAK', 'LTWAHR', 'SVKWPAGVGAK', 'VNYQAVGSGSGR', 'VNYQAVGSGSGRK', 'WPAGVGAK', 'LTQEQAVQVAMGMVK', 'AFIDQTVNFGASDDPMKDK'	'AFIDQTVNFGASDDPMK','APSLGFVPLK','WPAGVGAK','TWTLGTGK','VNYQAVGSGSGR'	PstS	Prochlorococcus
SARB5_0654	KEGG	'IEVLVAPPTSGTR', 'IVGSSTVYPYATVVAEK', 'TPVIESTGTGGGMK', 'AHIGVVPGIQEYLK', 'FKTPVIESTGTGGGMK', 'IGLVPLASDKYEVTR', 'WSDIDASLPNK', 'IVGSSTVYPYATVVAEKFGK', 'LTSNPDAYGFFGYSYLVANKDK', 'WSDIDASLPNKK'		PstS	SAR11
PMN2A_0441	KEGG	'AFIDQTVNFGASDDPMK', 'AFIDQTVNFGASDDPMKAK', 'ALNGITLDENLAGK', 'APSLGFVPLK', 'LSGAGASFPAK', 'VNYQAVGSGSGR', 'VNYQAVGSGSGRK', 'ALNGITLDENLAGKNPNPK', 'KAFIDQTVNFGASDDPMK', 'KAFIDQTVNFGASDDPMKAK', 'MTFAKKALIFTSLLAVGAGMSATAASR', 'AFIDQTVNFGASDDPMKAKDIAK'	'AFIDQTVNFGASDDPMK','APSLGFVPLK','WPAGVGAK','TWTLGTGK','VNYQAVGSGSGR'	PstS	Prochlorococcus
SYNW1018	KEGG	'AFIDQTVNFGASDDPMK', 'APSLGFVPLK', 'GKVVAAALQNK', 'SVKWPAGVGAK', 'WPAGVGAK', 'APSLGFVPLKGDILAK', 'SGGPQVNYQAVGSGSGR', 'AFIDQTVNFGASDDPMKK', 'KAFIDQTVNFGASDDPMK', 'SGGPQVNYQAVGSGSGRK', 'WFADLAK', 'GNSGVAGVIQNR', 'SGEFLKPSVAAGAR', 'MGAIGYVNQSYIK', 'ALNGIQLDKDLAGK', 'ALNGIQLDKDLAGKNPNPTAK', 'LNGAGASFPAK'	'AFIDQTVNFGASDDPMK','APSLGFVPLK','WPAGVGAK','GDILAK','SGGPQVNYQAVGSGSGR','GNSGVAGVIQNR'	PstS	Synechococcus
PMT9312_0722	KEGG	'AFIDQTVNFGASDDPMK', 'APSLGFVPLK', 'GKVVAAALQNK', 'SVKWPAGVGAK', 'WPAGVGAK', 'APSLGFVPLKGDILAK', 'SGGPQVNYQAVGSGSGR', 'AFIDQTVNFGASDDPMKK', 'KAFIDQTVNFGASDDPMK', 'SGGPQVNYQAVGSGSGRK', 'WFADLAK', 'GNSGVAGVIQNR', 'SGEFLKPSVAAGAR', 'MGAIGYVNQSYIK', 'ALNGIQLDKDLAGK', 'ALNGIQLDKDLAGKNPNPTAK', 'LNGAGASFPAK'	'AFIDQTVNFGASDDPMK','APSLGFVPLK','WPAGVGAK','SGGPQVNYQAVGSGSGR'	PstS	Synechococcus
AQL32926.1	GenBank	'AIAQIGHFQDGR', 'DGTVVYEDANRLER', 'GLIASANEKDYNK', 'GLIASANEKDYNKK', 'ILSYNLK', 'ISSFNVSDNLPK', 'ITPPPSYLNYAK', 'ITPPPSYLNYAKNPGFEGITR', 'IYAVNDGTFK', 'IYVIDPSSSPALLER', 'KDGTVVYEDANR', 'KGVEPESVTYSK', 'LERAIAQIGHFQDGR', 'QWGAVNYQLDR', 'REPDGLTWIDNDHFATANEGDYKHIDPNQAK', 'STGETLFLNIGKI', 'TKQWGAVNYQLDR', 'TLMYTDSDLGVVGLVDISDPARPK', 'ELVTDLKPVMK', 'GVEPESVTYSK', 'INGTPYLFVGAER', 'LYPLVEK', 'NPGFEGI…		PhoA	Prochlorococcus
AQL32157.1	GenBank	'EGQAKRGGSR', 'STGETLFLNIGKL', 'EPDGLTWIDNDHFATANEGDYK', 'GVEPESVTYAK', 'KGVEPESVTYAK', 'KSTGETLFLNIGKL', 'REPDGLTWIDNDHFATANEGDYK', 'STGETLFLNIGK', 'VSSFAINRNLPSGVKSTTK', 'KSTGETLFLNIGK', 'KGGVGISELTHHDGYLYAIER', 'GLIASSNEKDYNKK'		PhoA	Prochlorococcus
CAE06711.1	GenBank	'RAQLLLGDEGDDVIR', 'ETILQTAAGLGK', 'RDAALQAYYEWMPIREPALR', 'LATGQPLNQDELALFDEATK', 'GGPGADSLNGGPGDDLILGGAGADSFRISKGDDR', 'VDATTTADIPTGFAHGRFR', 'MARISDSIISPLQSVSPGGAEK', 'QILFISPNEGDGR', 'AKDLEDFGDVSK', 'SDDKGTEPETVEYFSFGK', 'KEKITGVFGLGYK', 'DWSGIPFDTTDKDDGYNPTVK', 'GGQVVAIDYSNGYGK', 'ITGVFGLGYK', 'KQILFISPNEGDGR', 'YGVSSDDEFWSDEVR'		PhoA	Synechococcus
SAR11_phoA_consensus (closet BLAST hit MBD1151911.1)	alkP consensus	'DGELKMVDTIENVR', 'YIFVGAER', 'KDGELKMVDTIENVR', 'KGVEPESVEVAMYGDTRYIFVGAER', 'ALASAGYWPEKR', 'MVDTIENVR', 'NGSVVYESGSSYER', 'NLFISANEVDKEK', 'ALASAGYWPEK', 'GWTIFNK', 'FGTPANNPSAEETSAEIIAATADGMK', 'KGVEPESVEVAMYGDTR', 'LVYSDSPANALGMIDITDPANPKPLGHMHLGGEPTSVAIK', 'SVTIYSLD', 'GVEPESVEVAMYGDTR', 'MVDTIENVRR'		PhoA	SAR11
type1_phoX_consensus (closest BLAST hit MBO8221277.1)	alkP consensus	'TDEDLTGKVAK', 'KTMFVGVQHPGEK', 'KTMFVGVQHPGEKNPDSCHFPDGGNSVPR', 'ASGLPETSDDVRK', 'ENNPYGQIVR', 'GVKDNQPINAVNPR', 'STVIAITR', 'DNQPINAVNPR', 'ESGMSEPEIAIFTR', 'HGYITEIDPSKPQSMPR', 'KVEAYCALTNNK', 'WDLFVMAGNPETAEGLYKGSENINK', 'ESGMSEPEIAIFTRLAATK', 'FKHENCEVSISK', 'NGQVVAYMGDDERGEHLYK', 'NGQVVAYMGDDERGEHLYKFVSK', 'TGEISRFLVGPK', 'VGATTMDRPEWVAVNPK'	TMFVGVQHPGEK	PhoX	Prochlorococcus
SYNW1799	KEGG	'SQAGAELFR', 'LGGLGNVYGLAGNK', 'NSRLFEAGELQVAR', 'VETVQDKRNSR'		PhoX	Synechococcus
YP_001008735	NCBI RefSeq	'ENLQLYGLK', 'NSLSPLTSVEEEKLK', 'SSAVILTKPQSPPSNLEELKK'		Ferredoxin	Prochlorococcus
A09P0410a_00661380	JCVI	VTLVSESEGLNK		Ferredoxin	Synechococcus
EDZ59792.1	GenBank	'GALLVGPPGTGK', 'QVVVSNPDIIGR'		Zn Protease	Prochlorococcus
F10SI03100a_00419650	JCVI	'ISGLYGMDALGVTECLEK'		Zn Transporter	Prochlorococcus
F10SI03150a_01311520	JCVI	AAGALTLNTDVLPGAK'		Zn Transporter	Prochlorococcus
YP_001484366	NCBI RefSeq	'DKVPVTILTGFLGSGK', 'GFISYSGNPR', 'FGDVDPEKLNTWMGR', 'IGLFTQHTAEEFNMK', 'VPVTILTGFLGSGK', 'TDLVSDDALNTLESR', 'IVFQGVHMLFTAQPDKEWGNEPR', 'NQLVFIGR', 'NLNEKEMQEGFDK', 'SFILNIEKPTK'		Cobalmain synthesis protein	Prochlorococcus
Syncc9605_2620	KEGG	'SLGGVTVGEDYIPLGNTEVAPIIAK', 'TANTIIKEQVK', 'AAGITPDKYPIMSFSIAEEEIR', 'AGTYEDLDAVR', 'AGTYEDLDAVRDTLIGIK', 'AMLPVYEAK', 'EVEEMAIKEINDAGGVK', 'ITYVSEDGASDWPTFAEK', 'KAMLPVYEAK', 'KVYLVGSDYVYPR', 'LDAPQGPIEMYPNHHISQTVR', 'LIDADKVAVVFGGWTSASR', 'VAVVFGGWTSASR', 'VGILHSLSGTMAISETTLK', 'VTNDPMESAYNMVYLWK', 'VYLVGSDYVYPR'	LIDADK,VGILHSLSGTMAISETTLK,ITYVSEDGASDWPTFAEK	Urea Transporter	Synechococcus
PMM0970	KEGG	AMLPVYESK', 'KAMLPVYESK', 'KLIDQDGVPVVFGGWTSASR', 'LIDQDGVPVVFGGWTSASR', 'LIDQDGVPVVFGGWTSASRK', 'QAVEDAGTFENSAVR', 'TSNTITKEQLK', 'VVADPQESAYNMVYLWK', 'VVGEDYLPLGNTEVAPIISK', 'EALVGQTFDAPQGPVEVMPNHHLAQTVR', 'SPAAGKPFFLVGSDYVFPR', 'ALAPSGGGVIINTLNGDQNVAFFK', 'IGLIKPEGGFEILEETDGVVYPQAWNQFEPSSK', 'KLIDQDGVPVVFGGWTSASRK'	,LIDQDGVPVVFGGWTSASRK,KLIDQDGVPVVFGGWTSASR	Urea Transporter	Prochlorococcus
ABM70172.1	GenBank	'ALPDGGIIINTLNGDQNVAFFK', 'AMLPVYESK', 'FDAPQGPVEVMPNHHLSQTVR', 'IEYIVEDGASDWPTFAEK', 'IGEINAEGGFTILEETGVVLPQAWNQK', 'KALPDGGIIINTLNGDQNVAFFK', 'KAMLPVYESK', 'KLIDQDGVPVVFGGWTSASR', 'LIDQDGVPVVFGGWTSASR', 'LIDQDGVPVVFGGWTSASRK', 'MAIEEINAAGGVK', 'QAVEDAGTFDDNAVR', 'QAVEDAGTFDDNAVREALVGQK', 'RSPAAGGDFFLVGSDYVFPR', 'SPAAGGDFFLVGSDYVFPR', 'SYKIEYIVEDGASDWPTFAEK', 'VVADPQESAYNMVYLWK', 'VVGEDYLPLGNTEV…		Urea Transporter	Prochlorococcus
EAU75247.1	GenBank	AMLPVYESK', 'KAMLPVYESK', 'LIDQDNVPVVFGGWTSASR', 'VVADPQESAYNMVYLWK', 'VLPDGGVIINTLNGDQNVAFFK', 'EALVGIEFDAPQGPVK', 'TSNTITKEQLK', 'VMPNHHLSQTVR', 'KLIDQDNVPVVFGGWTSASR'	LIDQDNVPVVFGGWTSASR	Urea Transporter	Synechococcus
PMT9312_0265	KEGG	'SKNAVNILAK', 'VSEEEETQGLDIGEHGMEAYPDFASAK'	NAVNILAK	Ammonium Transporter	Prochlorococcus
YP_001091877	NCBI RefSeq	IEVATTDDQVDQVIEAISK,LVTAVVKPFK		PII	Prochlorococcus
PMT9312_0214	KEGG	GSEFTVEFLQK,IALVNSGIVGMTVSEVR,IFITSIDSVVR,VNSVIDAIAEAAK	GSEFTVEFLQK	PII	Prochlorococcus
