# Supplementary material for: Part 1: Zonal gradients in phosphorus and nitrogen acquisition and stress revealed by metaproteomes of Prochlorococcus and Synechococcus
Source: Copernicus journal article supplement (doi:10.5194/egusphere-2024-3987), 2025-02-05
Supplement: Supplementary file 8 [file Table S3.xlsx]

## Sheet: Table S3
Table S3. Details of quantified peptide biomarkers
Details on the quantified peptide biomarkers that are used to represent each protein in the subsequent plots and discussions.
For Prochlorococcus strains, ‘HL’ and ‘LL’ refer to high-light and low-light adapted strains, respectively.
See Held et al (submitted) for details for method for quantifying protein concentrations
Protein		Quantified peptide	Strains with this peptide
		(amino acid sequence)
Synecho-coccus	PhoA	HYIAVALER	WH8102 (clade III)
	PhoX	SQAGAELFR	WH8102 (clade III)
	PstS	WFQELAAAGGPK	RCC307 (clade X)
Prochlorococcus	PhoA	IYVIDPSSSPALLER	MIT9311 (clade HL II)
			MIT9312 (clade HL II)
			MIT9314 (clade HL II)
	PhoX	GNLWIQTDGK	MIT9314 (clade HL II)
	PstS	LSGAGASFPAK	MIT9301 (clade HL II)
			MIT9302 (clade HL II)
			MIT9311 (clade HL II)
			MIT9312 (clade HL II)
			MIT9314 (clade HL II)
			SB (clade HL II)
			NATL1A (clade LL I)
			NATL2A (clade LL I)
