# Supplementary material for: Part 1: Zonal gradients in phosphorus and nitrogen acquisition and stress revealed by metaproteomes of Prochlorococcus and Synechococcus
Source: Copernicus journal article supplement (doi:10.5194/egusphere-2024-3987), 2025-02-05
Supplement: Supplementary file 9 [file Table S4.xlsx]

## Sheet: Table S4
Table S4. Description of nutrient addition bioassays involving DOP and trace metals
Description of nutrient bioassays conducted in surface waters at station 2 and 3.
Samples were collected for chlorophyll, alkaline phosphatase (AP), cell abundance of Prochlorococcus and Synechoccous and protein biomarkers (Table S2)
Sample collection and analysis was conducted in duplicate for all properties except AP. See Table S4 for raw data.
Station	JC150_2	JC150_3
Latitude, Longitude	22°N, 54°W	22°N, 50°W
	+ 500 nM DOP	+ 500 nM DOP
	+ 500 nM DOP + 1 nM Zn	+ 500 nM DOP + 1 nM Zn
	+500 nM DOP + 1 nM Fe	+500 nM DOP + 1 nM Fe
1. A mixture of dissolved organic phosphorus (DOP) was produced by preparing stocks of adenosine monophosphate, adenosine diphosphate,
adenosine triphosphate, D-glucose phosphate, diethyl phosphonate in MilliQ water and mixing equal molar ratios of stock standards to
achieve a final concentration of 500 nM of phosphorus in 20L of seawater.
2. Iron (Fe), Zinc (Zn) and Cobalt (Co) were added in the forms of iron chloride, zinc chloride and cobalt chloride.
Stocks were 6M hydrochloric acid UPA grade (supplier Sigma Aldrich).
