# Supplementary material for: Part 1: Zonal gradients in phosphorus and nitrogen acquisition and stress revealed by metaproteomes of Prochlorococcus and Synechococcus
Source: Copernicus journal article supplement (doi:10.5194/egusphere-2024-3987), 2025-02-05
Supplement: Supplementary file 10 [file Table S5.xlsx]

## Sheet: Table S5
Table S5. Description of nutrient addition bioassays involving DOP and trace metals
Station	Treatment	Chlorophyll	APA	Pro	Syn	Pro_PstS	Pro_PhoA	Pro_PhoX	Syn_PstS	Syn_PhoA	Syn_PhoX
number	See Table S3	mg per L	nmols P per L	cells per mL	cells per mL	fmol per L	fmol per L	fmol per L	fmol per L	fmol per L	fmol per L
2	Control	0.067	3.41	55816	3838	473.534	54.518	17.913	1.863	7.717	25.534
2	Control	0.08	3.08	54151	4023	330.653	35.369	15.139	0.691	5.657	16.785
2	Control	NaN	2.6	NaN	NaN	NaN	NaN	NaN	NaN	NaN	NaN
2	DOP	0.115	2.89	23969	2620	100.667	23.872	66.379	4.402	36.56	24.541
2	DOP	0.123	4.31	24413	2526	9.04	4.536	16.454	2.445	11.875	9.347
2	DOP	NaN	1.86	NaN	NaN	NaN	NaN	NaN	NaN	NaN	NaN
2	DOP+Fe	0.111	6.88	23566	2958	57.028	15.389	25.582	2.889	13.347	23.772
2	DOP+Fe	0.105	12	20820	3094	83.424	17.806	13.908	5.927	44.366	9.645
2	DOP+Fe	NaN	10.22	NaN	NaN	NaN	NaN	NaN	NaN	NaN	NaN
2	DOP+Zn	0.092	2.56	17200	3181	76.432	29.841	56.461	4.886	50.174	34.419
2	DOP+Zn	0.085	4.92	17948	2768	59.931	17.715	26.338	7.113	35.337	21.564
2	DOP+Zn	NaN	1.48	NaN	NaN	NaN	NaN	NaN	NaN	NaN	NaN
3	Control	0.081	3.66	116715	2829	470.278	54.687	23.265	3.553	30.03	16.625
3	Control	0.084	3.43	54862	5328	246.898	41.001	8.336	0.924	13.265	13.41
3	Control	NaN	3.44	NaN	NaN	NaN	NaN	NaN	NaN	NaN	NaN
3	DOP	0.113	3.02	47503	3817	39.088	8.398	10.374	0.388	5.657	19.74
3	DOP	0.113	3	10685	5344	23.667	15.051	26.402	7.645	25.525	17.614
3	DOP	NaN	2.55	NaN	NaN	NaN	NaN	NaN	NaN	NaN	NaN
3	DOP+Fe	0.108	2.76	18844	6249	15.416	3.613	20.497	0.358	44.732	17.35
3	DOP+Fe	0.164	2.19	NaN	NaN	25.893	12.004	20.678	0.076	30.794	17.509
3	DOP+Fe	NaN	2.62	NaN	NaN	NaN	NaN	NaN	NaN	NaN	NaN
3	DOP+Zn	0.106	3.27	37400	4144	13.02	7.848	11.527	4.464	19.209	11.984
3	DOP+Zn	0.149	3.29	42106	3118	34.299	26.531	40.525	5.124	34.488	29.81
3	DOP+Zn	NaN	1.96	NaN	NaN	NaN	NaN	NaN	NaN	NaN	NaN
